# Supplementary material for: Characteristics of biogenically-derived aerosols over the Amundsen Sea, Antarctica
Source: Copernicus journal article supplement (doi:10.5194/acp-2019-133), 2019-03-20
Supplement: Supplementary file 1 [file acp-2019-133-supplement.pdf]

**Supplementary material for the manuscript:**

## **Characteristics of biogenically-derived aerosols over the Amundsen Sea, Antarctica**

Jinyoung Jung<sup>1</sup>, Sang-Bum Hong<sup>1</sup>, Meilian Chen<sup>2,5</sup>, Jin Hur<sup>2</sup>, Liping Jiao<sup>3</sup>, Youngju Lee<sup>1</sup>, Keyhong Park<sup>1</sup>,  
Doshik Hahm<sup>4</sup>, Jung-Ok Choi<sup>1</sup>, Eun Jin Yang<sup>1</sup>, Jisoo Park<sup>1</sup>, Tae-Wan Kim<sup>1</sup>, and SangHoon Lee<sup>1</sup>

<sup>1</sup>Korea Polar Research Institute, 26 Songdomirae-ro, Yeonsu-gu, Incheon 21990, Republic of Korea

<sup>2</sup>Sejong University, 209 Neungdong-ro, Gwangjin-gu, Seoul 05006, Republic of Korea

<sup>3</sup>Third Institute of Oceanography, State Oceanic Administration, Xiamen 361005, China

<sup>4</sup>Pusan National University, Busan 46241, Republic of Korea

<sup>5</sup>Environmental program, Guangdong Technion-Israel Institute of Technology, Shantou 515063, China

Correspondence to Jinyoung Jung (email:[jinyoungjung@kopri.re.kr](mailto:jinyoungjung@kopri.re.kr))

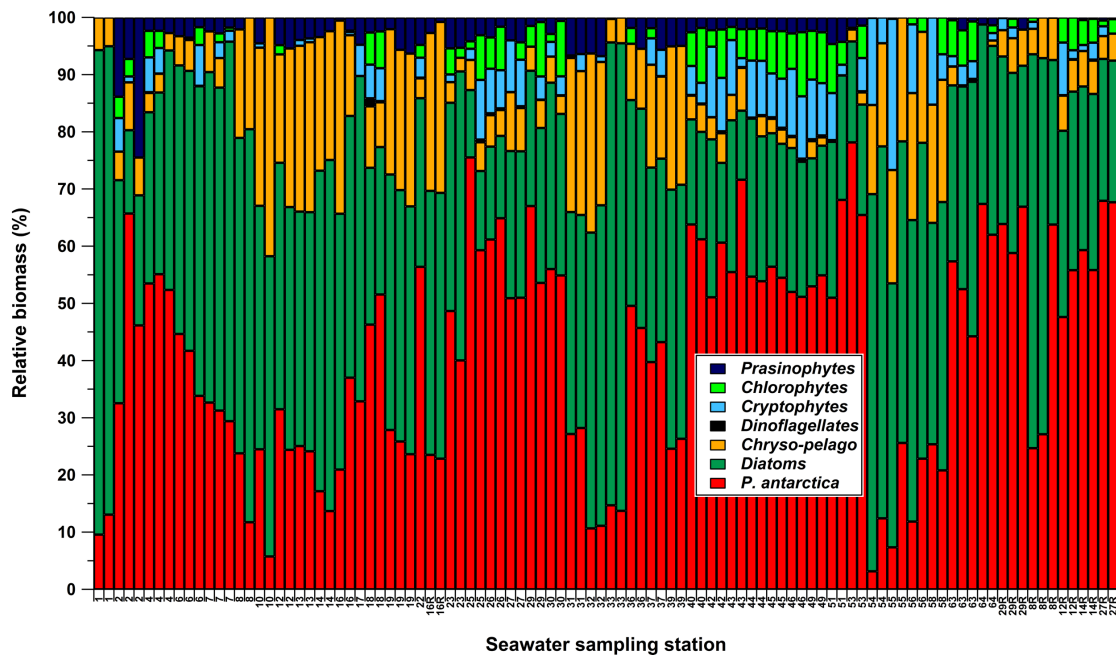

**Figure S1.** Relative biomass (%) of phytoplankton groups observed in the upper 50 m of the Amundsen Sea during the ANA06B cruise.

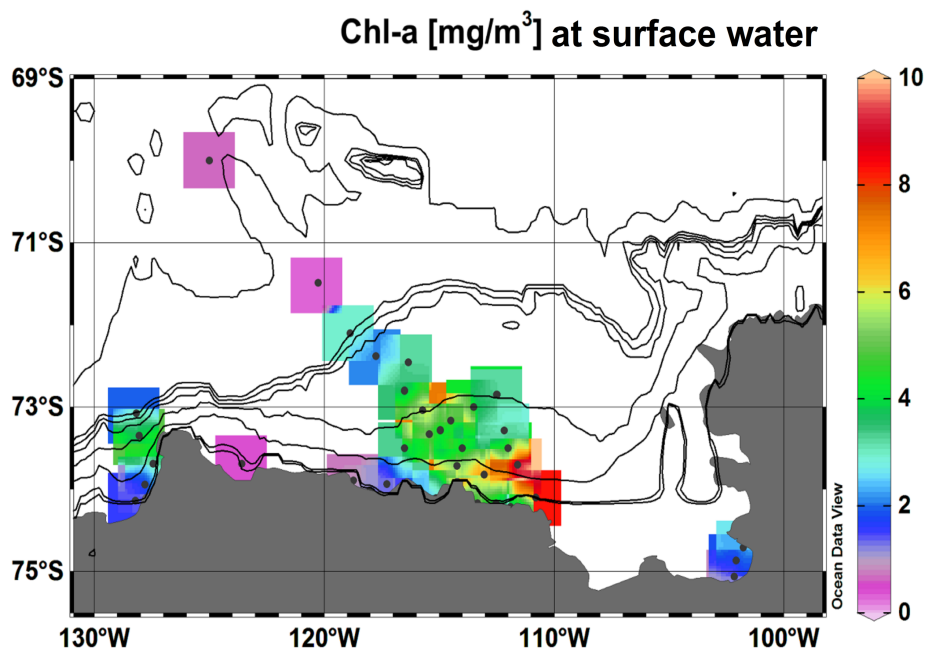

**Figure S2.** In situ sea surface chlorophyll-a (Chl-a) concentration ( $\text{mg m}^{-3}$ ) observed in the Amundsen Sea during the ANA06B cruise.

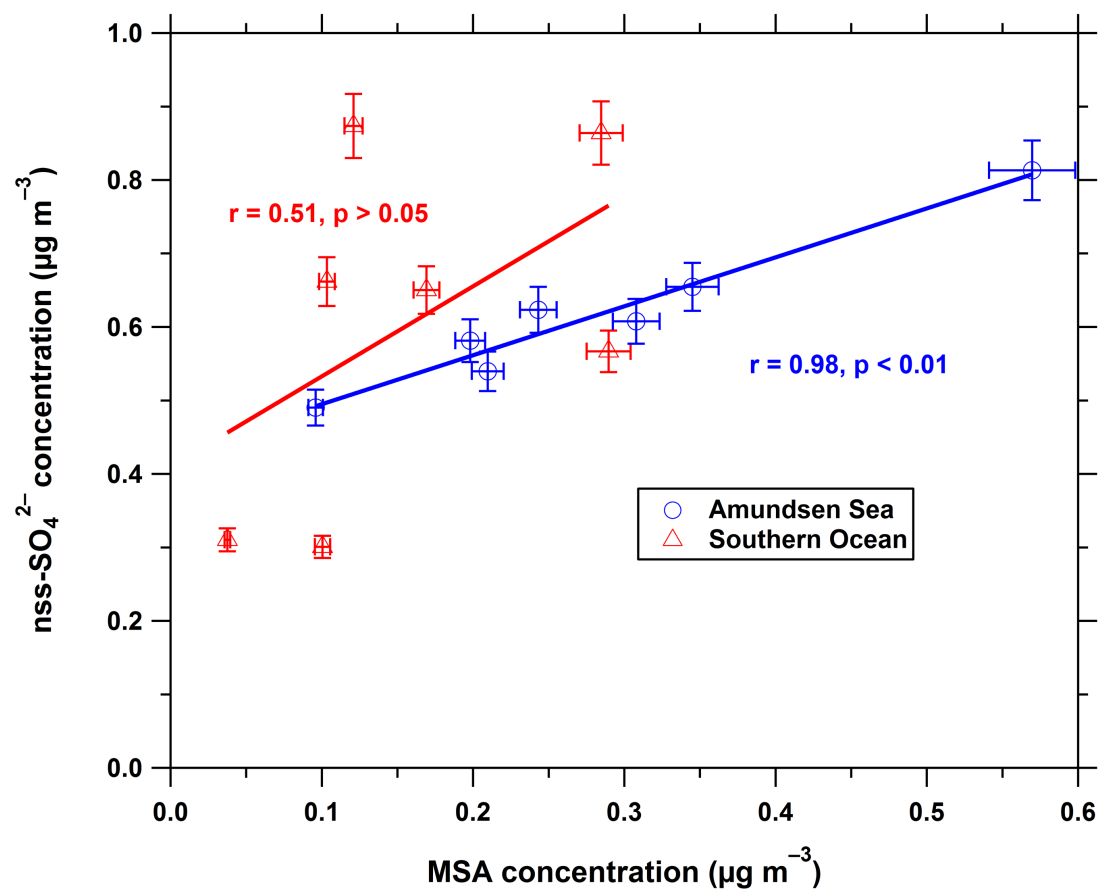

**Figure S3.** Relationships between nss-SO<sub>4</sub><sup>2-</sup> and MSA observed over the Southern Ocean (open triangles) and the Amundsen Sea (open circles).

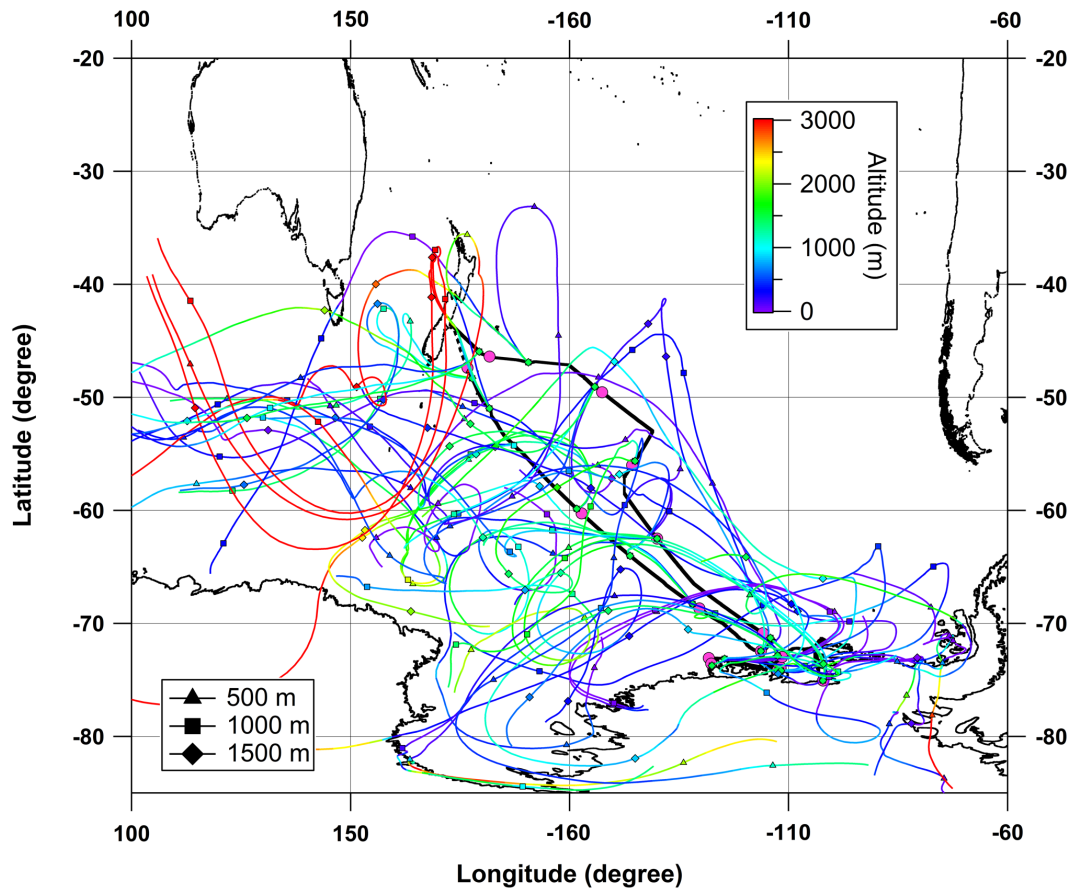

**Figure S4.** The 168 hours (7 days) air mass backward trajectories for starting altitudes of 500 m (triangle symbols), 1000 m (square symbols) and 1500 m (diamond symbols) above ground level (a.g.l.) during the collection of aerosol samples were calculated from the Global Data Assimilation System (GDAS) database of the National Ocean and Atmospheric Administration (NOAA) and simulated by using the Hybrid Single-Particle Lagrangian Integrated Trajectory (HY-SPLIT) model (<http://www.arl.noaa.gov/ready/hysplit4.html>). Pink circles and black line indicate aerosol sampling locations and cruise track during the cruise, respectively.

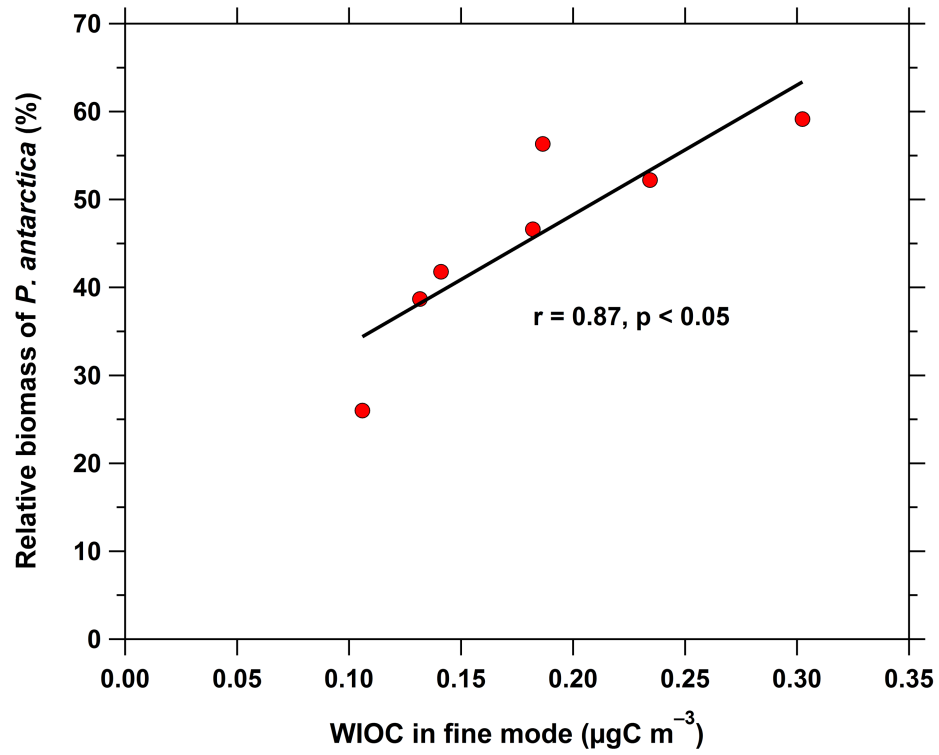

**Figure S5.** Relationship between relative biomass of *Phaeocystis antarctica* (*P. antarctica*) and WIOC concentration in fine mode observed over the Amundsen Sea.
